# Supplementary material for: A series of boroselenite-based open frameworks mediated by the cationic sizes of the alkali metals
Source: Royal Society of Chemistry journal article supplement (doi:10.1039/c2ce26524a), 2012-01-01
Supplement: c2ce26524a.pdf [file c2ce26524a.pdf]

# A Series of Boroselenite-based Open Frameworks Mediated by The Cationic Sizes of the Alkali Metals

Jian-Han Zhang, Fang Kong, Bing-Ping Yang, and Jiang-Gao Mao\*

## Supporting Information

**Figure S1.** The energy-dispersive spectrometry plots and ratios for NaSeB<sub>3</sub>O<sub>7</sub> (a), KSeB<sub>3</sub>O<sub>7</sub> (b) and K<sub>2</sub>Se<sub>3</sub>B<sub>2</sub>O<sub>10</sub> (c).

**Figure S2.** Simulated and measured XRD powder patterns for Li<sub>2</sub>SeB<sub>8</sub>O<sub>15</sub> (a), NaSeB<sub>3</sub>O<sub>7</sub> (b), KSeB<sub>3</sub>O<sub>7</sub> (c), and K<sub>2</sub>Se<sub>3</sub>B<sub>2</sub>O<sub>10</sub> (d).

**Figure S3.** a) View of the structure of NaSeB<sub>3</sub>O<sub>7</sub> along *a*-axis. b) Side view of [SeB<sub>3</sub>O<sub>7</sub>]<sup>-</sup> layer with 10-MRs channels along *c*-axis. c) The 10-MR with a free diameter of 6.91 × 4.47 Å. d) View of the structure of NaSeB<sub>3</sub>O<sub>7</sub> along *c*-axis. Na, Se, B, and O atoms are drawn as green, pink, yellow, and red circles, respectively.

**Figure S4.** a) View of the structure of Li<sub>2</sub>SeB<sub>8</sub>O<sub>15</sub> along *a*-axis. b) A 2D anionic borate layer of [B<sub>4</sub>O<sub>18</sub>]<sup>4+</sup> in *ac* plane. c) A single [SeB<sub>8</sub>O<sub>15</sub>]<sup>2-</sup> framework with large 14- and 16-MRs channels along *c*-axis. d) 2-fold interpenetrating [SeB<sub>8</sub>O<sub>15</sub>]<sup>2-</sup> anionic frameworks. Li, Se, B, and O atoms are drawn as green, pink, yellow, and red circles, respectively.

**Figure S5.** Optical diffuse reflectance spectra for Li<sub>2</sub>SeB<sub>8</sub>O<sub>15</sub> (a), NaSeB<sub>3</sub>O<sub>7</sub> (b), KSeB<sub>3</sub>O<sub>7</sub> (c), and K<sub>2</sub>Se<sub>3</sub>B<sub>2</sub>O<sub>10</sub> (d).

**Figure S6.** IR spectra for Li<sub>2</sub>SeB<sub>8</sub>O<sub>15</sub> (a), NaSeB<sub>3</sub>O<sub>7</sub> (b), KSeB<sub>3</sub>O<sub>7</sub> (c), and K<sub>2</sub>Se<sub>3</sub>B<sub>2</sub>O<sub>10</sub> (d).

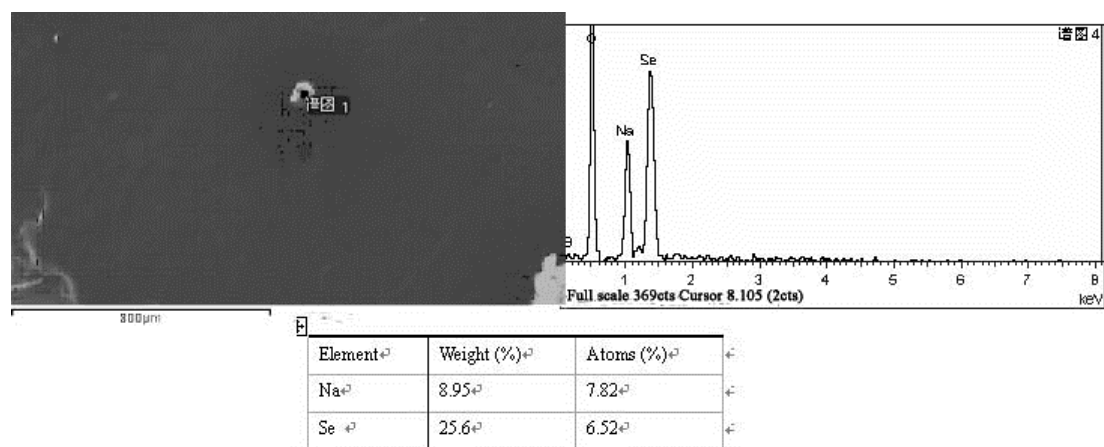

(a)

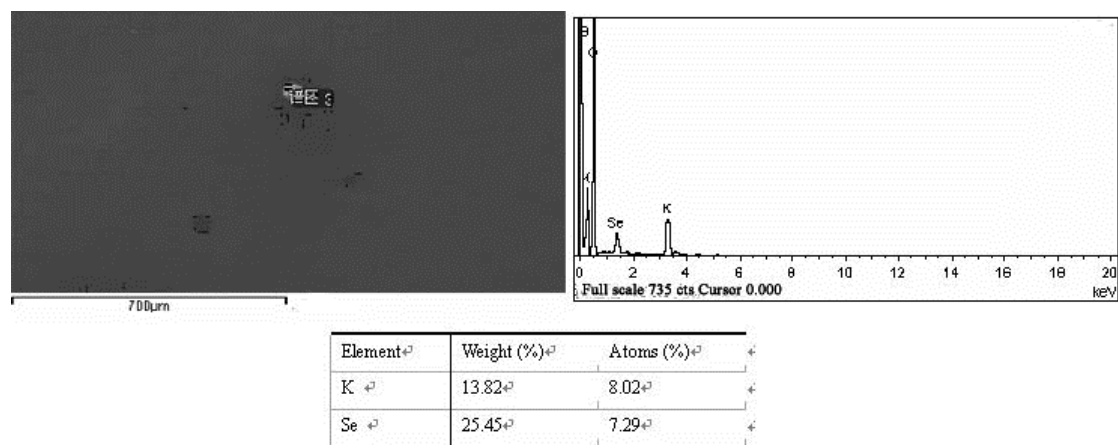

(b)

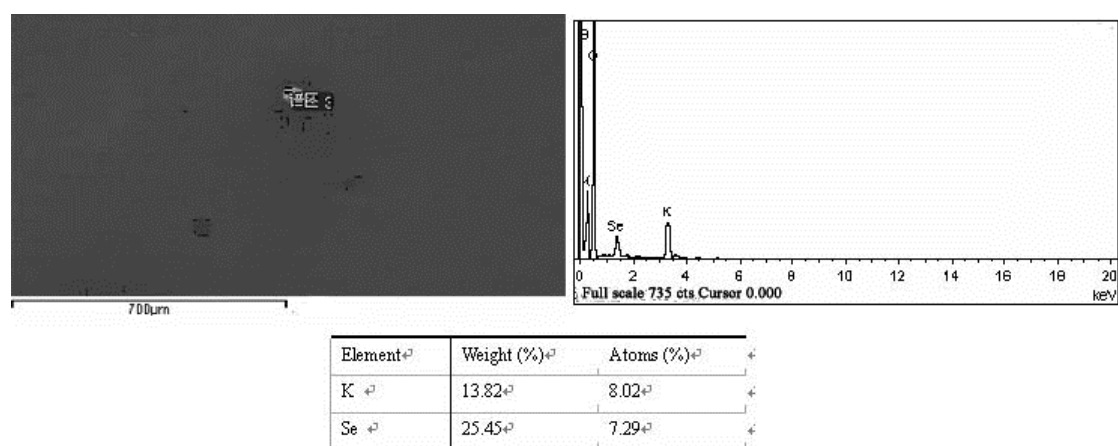

(c)

**Figure S1.** The energy-dispersive spectrometry plots and ratios for NaSeB<sub>3</sub>O<sub>7</sub> (a),

$\text{KSeB}_3\text{O}_7$  (b) and  $\text{K}_2\text{Se}_3\text{B}_2\text{O}_{10}$  (c).

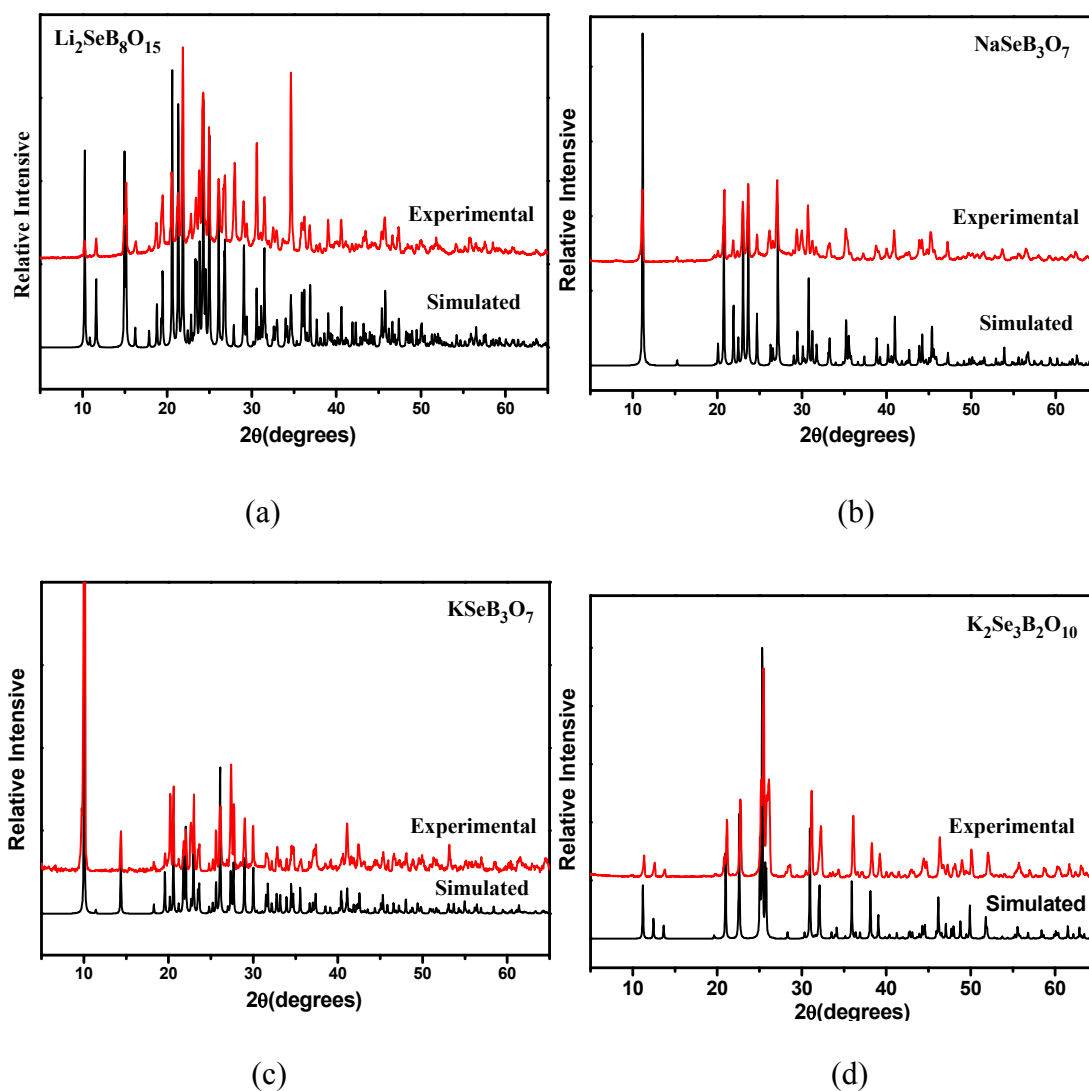

**Figure S2.** Simulated and measured XRD powder patterns for  $\text{Li}_2\text{SeB}_8\text{O}_{15}$  (a),  $\text{NaSeB}_3\text{O}_7$  (b),  $\text{KSeB}_3\text{O}_7$  (c), and  $\text{K}_2\text{Se}_3\text{B}_2\text{O}_{10}$  (d).

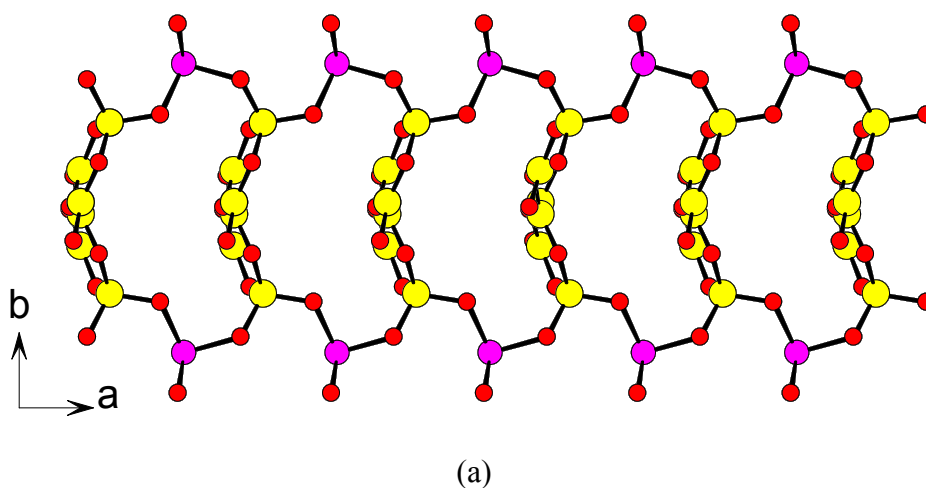

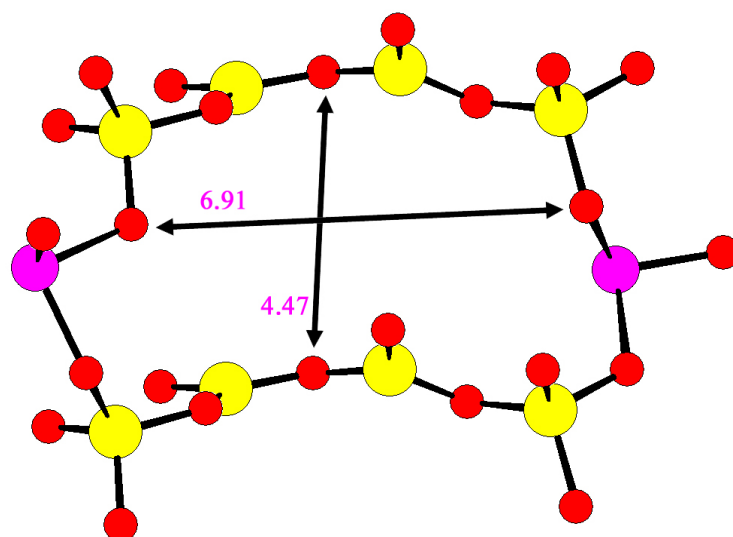

(b)

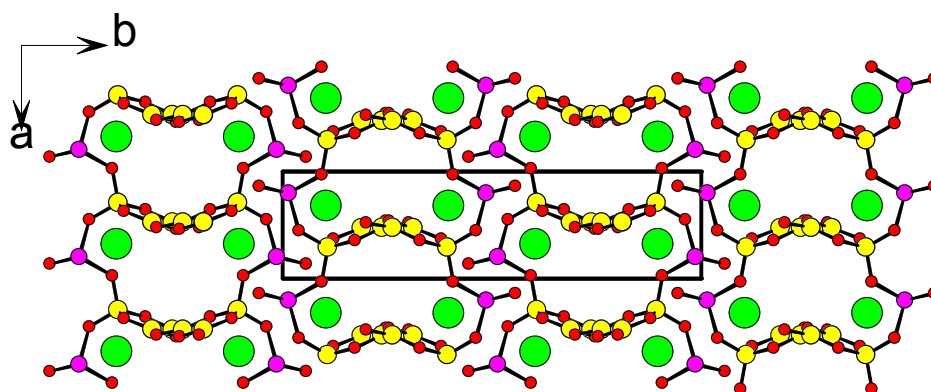

(c)

**Figure S3.** a) Side view of  $[\text{SeB}_3\text{O}_7]^-$  layer with 10-MRs channels along  $c$ -axis. b) The 10-MR with a free diameter of  $6.91 \times 4.47 \text{ \AA}$ . c) View of the structure of  $\text{NaSeB}_3\text{O}_7$  along  $c$ -axis. Na, Se, B, and O atoms are drawn as green, pink, yellow, and red circles, respectively.

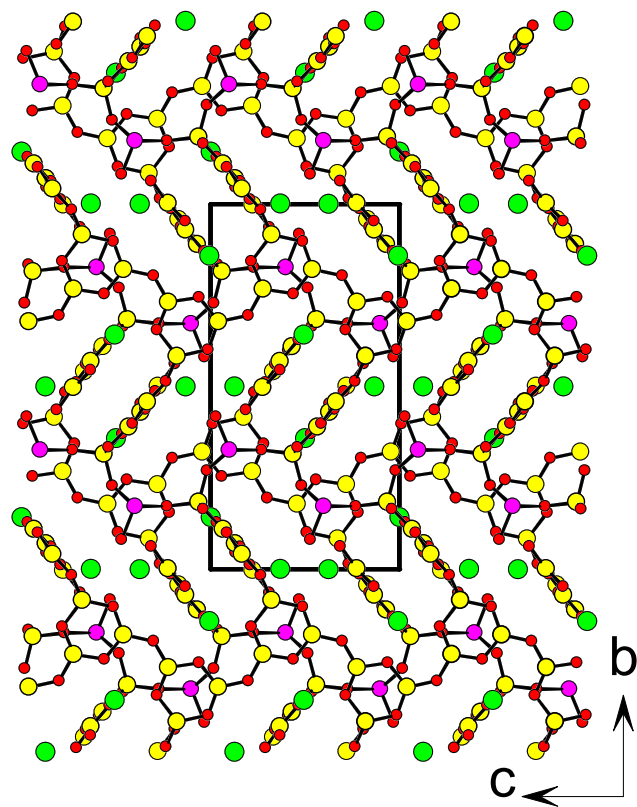

(a)

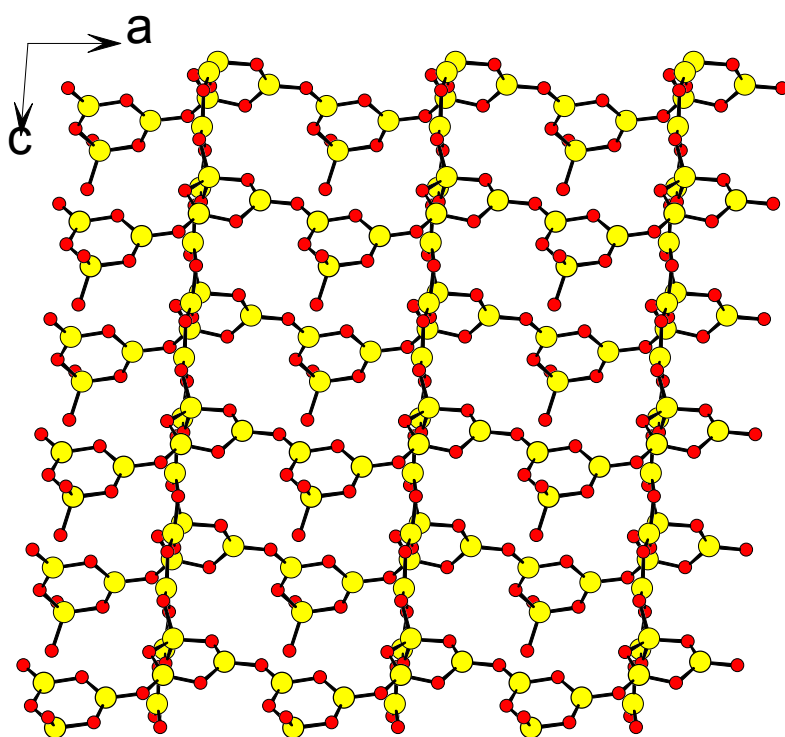

(b)

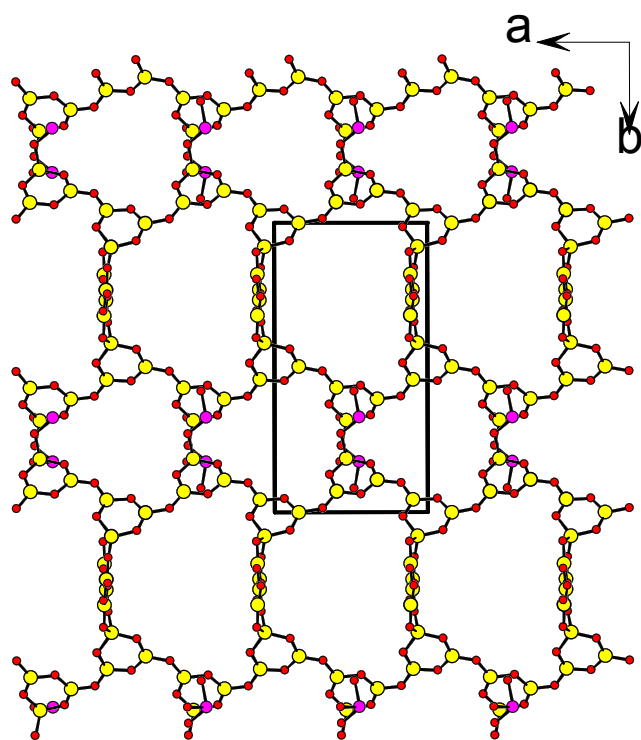

(c)

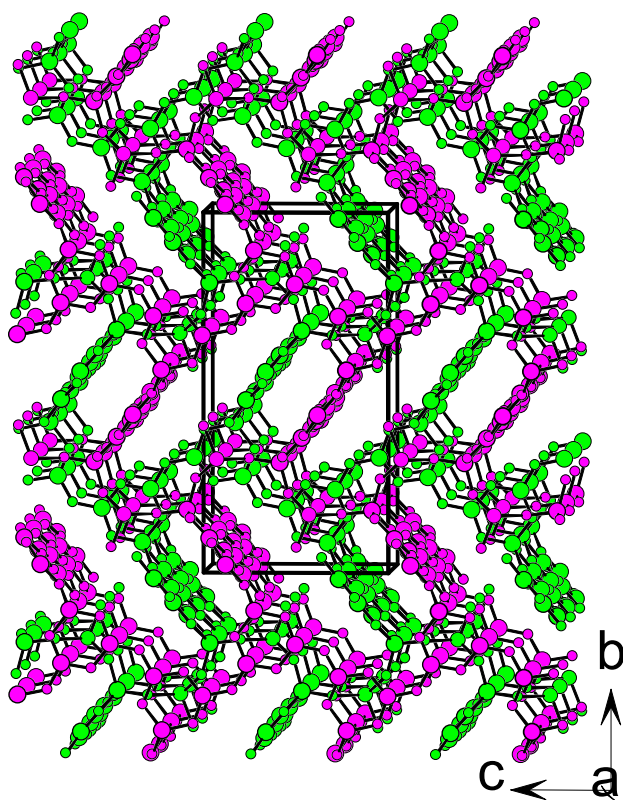

(d)

**Figure S4.** a) View of the structure of  $\text{Li}_2\text{SeB}_8\text{O}_{15}$  along  $a$ -axis. b) A 2D anionic borate layer of  $[\text{B}_4\text{O}_{18}]^{4-}$  in  $ac$  plane. c) A single  $[\text{SeB}_8\text{O}_{15}]^{2-}$  framework with large 14-

and 16-MRs channels along *c*-axis. d) 2-fold interpenetrating  $[\text{SeB}_8\text{O}_{15}]^{2-}$  anionic frameworks. Li, Se, B, and O atoms are drawn as green, pink, yellow, and red circles, respectively.

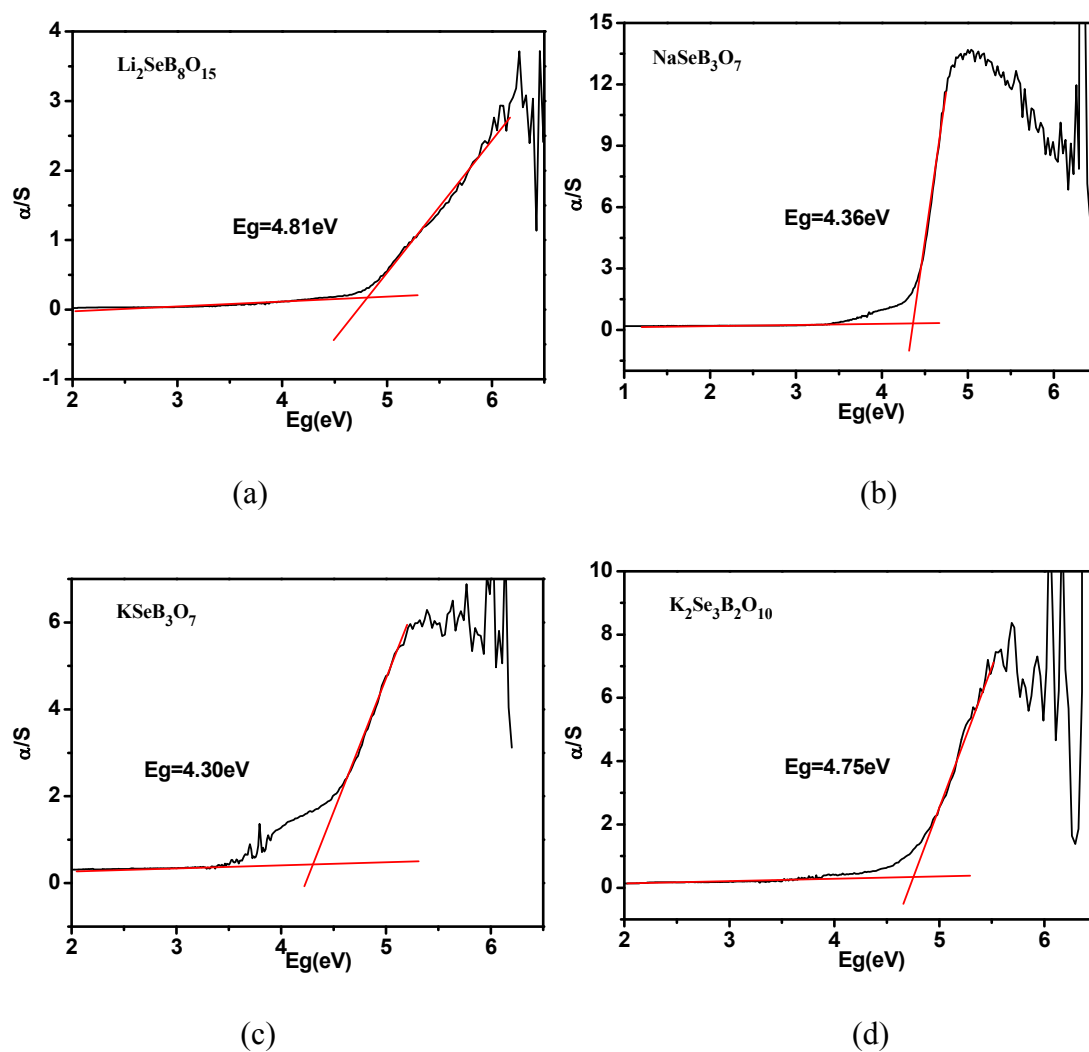

**Figure S5.** Optical diffuse reflectance spectra for  $\text{Li}_2\text{SeB}_8\text{O}_{15}$  (a),  $\text{NaSeB}_3\text{O}_7$  (b),  $\text{KSeB}_3\text{O}_7$  (c), and  $\text{K}_2\text{Se}_3\text{B}_2\text{O}_{10}$  (d).

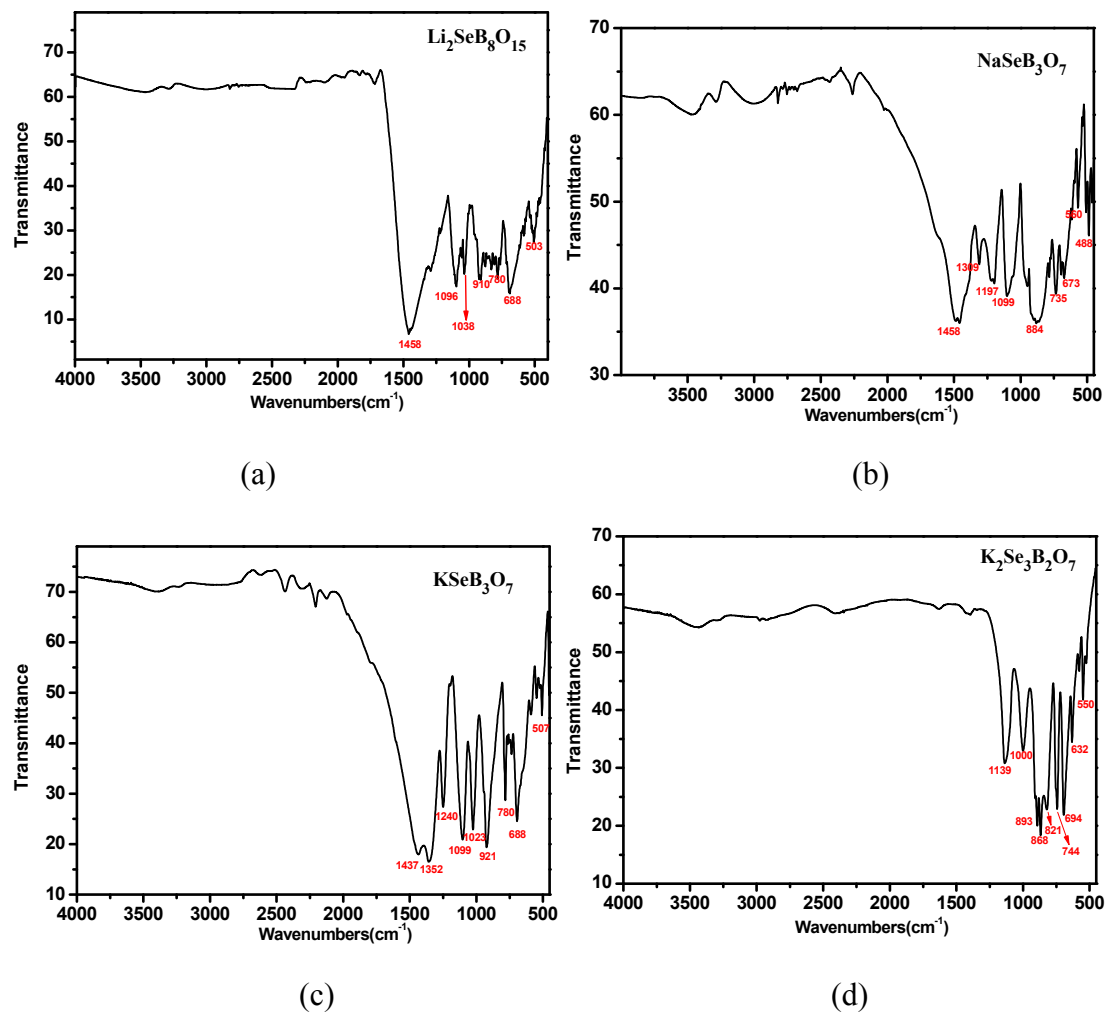

**Figure S6.** IR spectra for  $\text{Li}_2\text{SeB}_8\text{O}_{15}$  (a),  $\text{NaSeB}_3\text{O}_7$  (b),  $\text{KSeB}_3\text{O}_7$  (c), and  $\text{K}_2\text{Se}_3\text{B}_2\text{O}_{10}$  (d).
